# Supplementary material for: Nonlinear features of the superconductor–ferromagnet–superconductor φ0 Josephson junction in the ferromagnetic resonance region
Source: publisher site journal article supplement (doi:10.3762/bjnano.13.97), 2022-10-21
Supplement: Additional file 1 [file 2190-4286-13-97-S1.pdf]

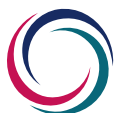

## Supporting Information

for

### **Nonlinear features of the superconductor–ferromagnet–superconductor $\varphi_0$ Josephson junction in the ferromagnetic resonance region**

Aliasghar Janalizadeh, Ilhom R. Rahmonov, Sara A. Abdelmoneim, Yury M. Shukrinov  
and Mohammad R. Kolahchi

*Beilstein J. Nanotechnol.* **2022**, *13*, 1155–1166. [doi:10.3762/bjnano.13.97](https://doi.org/10.3762/bjnano.13.97)

## **Details of calculations for Equation 22 and Equation 24**

According to our approximation, at small values of the system parameters, the  $y$  component of magnetization can be determined by the general Duffing equation (Equation S1):

$$\frac{d^2 m_y}{dt^2} + 2\alpha\omega_F \frac{dm_y}{dt} + \omega_F^2 m_y - \omega_F^2 m_y^3 = \omega_F^2 Gr \sin(\omega_J t). \quad (\text{S1})$$

In Equation S1,  $\alpha$  is a phenomenological damping constant,  $\omega_F$  is the frequency of the ferromagnetic resonance,  $\omega_J$  is the Josephson frequency,  $G$  is the ratio between Josephson energy and magnetic energy, and the parameter  $r$  determines the strength of the spin-orbit interaction.

In order to find frequency response function for Equation S1, we have performed the following procedure: We assume that the approximation solution of Equation S1 has the form

$$m_y = a \sin \omega_J t + b \cos \omega_J t, \quad (\text{S2})$$

where  $a$  and  $b$  are functions of  $\omega_J$ .

The first- and second-order derivatives of  $m_y$  are determined by

$$\begin{aligned} \frac{dm_y}{dt} &= a\omega_J \cos \omega_J t - b\omega_J \sin \omega_J t \\ \frac{d^2 m_y}{dt^2} &= -a\omega_J^2 \sin \omega_J t - b\omega_J^2 \cos \omega_J t. \end{aligned} \quad (\text{S3})$$

Using trigonometric identities, the cube of  $m_y$  can be written as

$$m_y^3 = \frac{3}{4}(a^2 + b^2)[a \sin \omega_J t + b \cos \omega_J t]. \quad (\text{S4})$$

Substituting Equation S3 and Equation S4 into Equation S1 and equating the coefficients at  $\sin \omega_J t$  and  $\cos \omega_J t$ , we find

$$\begin{aligned} [\omega_F^2 - \omega_J^2 - \frac{3}{4}\omega_F^2(m_y^{max})^2]a - 2\alpha\omega_F\omega_J b &= \omega_F^2 Gr \\ , 2\alpha\omega_F\omega_J a + [\omega_F^2 - \omega_J^2 - \frac{3}{4}\omega_F^2(m_y^{max})^2]b &= 0, \end{aligned} \quad (S5)$$

where  $(m_y^{max})^2 = a^2 + b^2$ . Squaring both side of the system in Equation S5 and summing them, we get the frequency response function,

$$(m_y^{max})^2 = \frac{(\omega_F^2 Gr)^2}{[\omega_J^2 - \omega_F^2 + \frac{3}{4}\omega_F^2(m_y^{max})^2]^2 + (2\alpha\omega_F\omega_J)^2}. \quad (S6)$$

Introducing  $\omega = \omega_J/\omega_F$ , we can rewrite it in a simple form:

$$(m_y^{max})^2 = \frac{(Gr)^2}{[\omega^2 - 1 + \frac{3}{4}(m_y^{max})^2]^2 + (2\alpha\omega)^2}. \quad (S7)$$

In Figure S1, the frequency dependence of the amplitude corresponding to the expression in Equation S7 for values of  $\alpha = 0.015, 0.02, 0.03, 0.04$  are demonstrated.

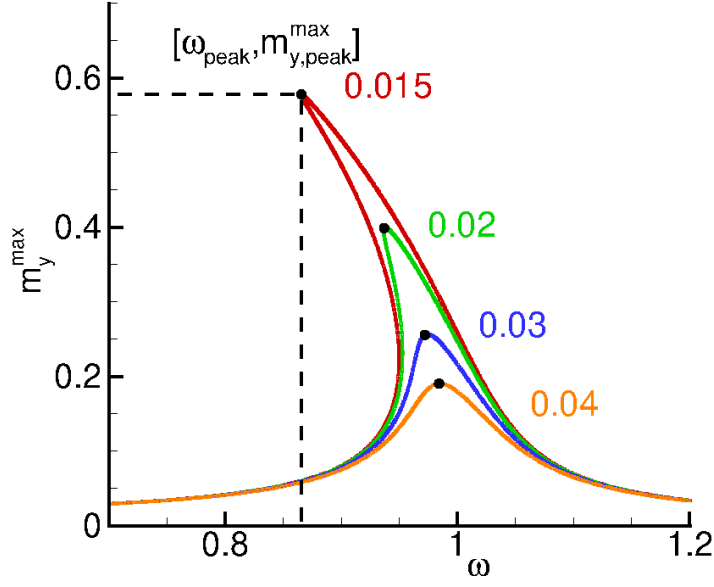

**Figure S1:** Frequency response in Equation S7, that is,  $m_y^{max}$  versus  $\omega$  for  $G = 0.05$ ,  $r = 0.05$ , and  $\omega_F = 0.5$ . Here, the numbers indicate the value of  $\alpha$ .

To find the analytical anomalous damping dependence, we need to differentiate both side of Equation S7 with respect to  $\omega$  and equate  $d(m_y^{max})/d\omega$  to zero. We find

$$(m_{y,peak}^{max})^2 = \frac{4}{3}(1 - \omega_{peak}^2 - 2\alpha^2). \quad (S8)$$

Here  $m_{y,peak}^{max}$  is the resonance peak and  $\omega_{peak}$  is its position as shown in Figure S1. Finally, substituting Equation S8 into Equation S7, we obtain

$$\frac{4}{3}(1 - \omega_{peak}^2 - 2\alpha^2) = \frac{(Gr)^2}{(-2\alpha^2)^2 + (2\alpha\omega_{peak})^2}. \quad (S9)$$

After simplification of this expression, it can be written as

$$\frac{16}{3}\alpha^2(\alpha^2 + \omega_{peak}^2 - 3\alpha^2\omega_{peak}^2 - \omega_{peak}^4 - 2\alpha^4) = (Gr)^2. \quad (S10)$$

The solution of Equation S10 with respect to  $\omega$  has the form

$$\omega_{peak} = \sqrt{\frac{1 - 3\alpha^2}{2} + \frac{1}{2}\sqrt{(1 - \alpha^2)^2 - 12\left(\frac{Gr}{4\alpha}\right)^2}}. \quad (S11)$$

Thus, it is an analytical expression for ADD and its plot is shown in Figure S2 for  $G = 0.05$  and  $r = 0.05$ .

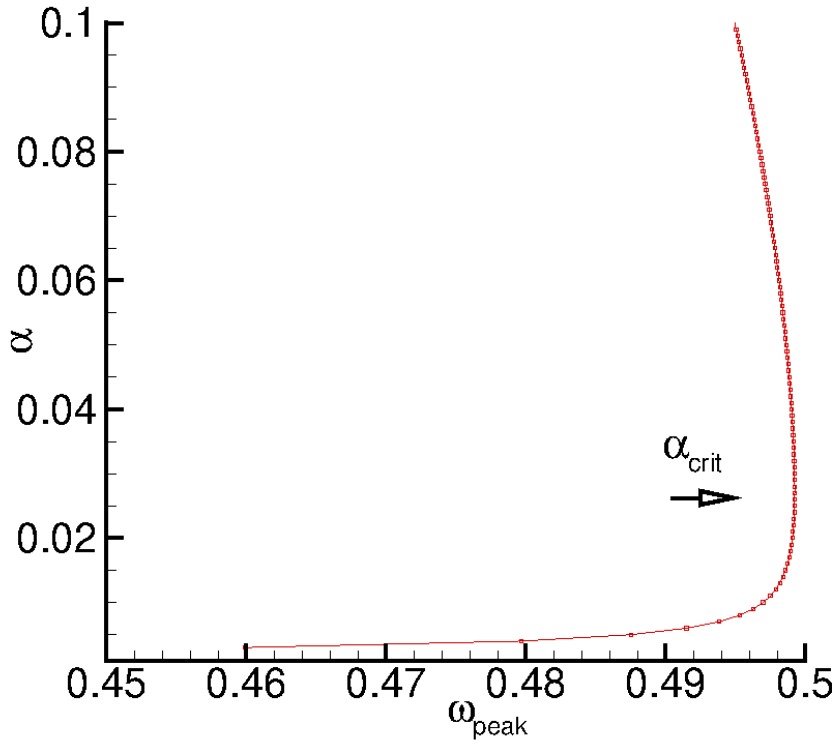

**Figure S2:** The resonance peak position depending on  $\alpha$  for  $G = 0.05$  and  $r = 0.05$  and  $\omega_F = 0.5$ .

We can also find the expression for the critical value of  $\alpha$ . To get it, we perform the following

procedure: After taking the derivative of Equation S10 with respect to  $\alpha$ , we equate  $\partial\omega_{peak}/\partial\alpha$  to zero and obtain the expression for  $\alpha_{crit}$ :

$$6\alpha_{crit}^4 - 2\alpha_{crit}^2(1 - 3\omega_{peak}^2) - \omega_{peak}^2 + \omega_{peak}^4 = 0. \quad (\text{S12})$$

Substituting  $\omega_{peak}$  in Equation S12 from Equation S11, we get

$$9\left(\frac{Gr}{4\alpha_{crit}}\right)^4 + 3\alpha_{crit}^2(10\alpha_{crit}^2 - 1)\left(\frac{Gr}{4\alpha_{crit}}\right)^2 - 2\alpha_{crit}^4(\alpha_{crit}^2 - 1)^2 = 0. \quad (\text{S13})$$

Taking into account  $10\alpha_{crit}^2 \ll 1$  and  $\alpha_{crit}^2 \ll 1$ , Equation S13 can be rewritten as

$$9\left(\frac{Gr}{4\alpha_{crit}}\right)^4 - 3\alpha_{crit}^2\left(\frac{Gr}{4\alpha_{crit}}\right)^2 - 2\alpha_{crit}^4 = 0. \quad (\text{S14})$$

The solution of Equation S14 has the form

$$\left(\frac{Gr}{4\alpha_{crit}}\right)^2 = \frac{3\alpha_{crit}^2 \pm \sqrt{9\alpha_{crit}^4 + 72\alpha_{crit}^4}}{18} \quad (\text{S15})$$

or

$$\left(\frac{Gr}{4\alpha_{crit}}\right)^2 = \frac{\alpha_{crit}^2 \pm 3\alpha_{crit}^2}{6}. \quad (\text{S16})$$

From here we can find

$$\alpha_{crit} = \frac{1}{2} \sqrt{\sqrt{\frac{3}{2}} Gr}. \quad (\text{S17})$$
